# Supplementary material for: Early branching arbuscular mycorrhizal fungus Paraglomus occultum carries a small and repeat-poor genome compared to relatives in the Glomeromycotina
Source: PubMed Central journal article supplement (PMC9453076; doi:10.1099/mgen.0.000810), 2022-04-22
Supplement: mgen-8-0810-s001.pdf [file mgen-8-0810-s001.pdf]

**Supplementary Tables:**

**Supplementary Table 1: Total secretory proteins predicted for this study from all genomes**

| <b>Strain</b>                        | <b>Secreted gene count</b> |
|--------------------------------------|----------------------------|
| <i>Paraglomus Occultum</i>           | <b>209</b>                 |
| <i>Geosiphon pyriformis</i>          | 365                        |
| <i>Gigaspora rosea</i> v1.0          | 877                        |
| <i>Mortierella elongata</i> v2.0     | 810                        |
| <i>Mucor circinelloides</i> v2.0     | 372                        |
| <i>Phycomyces blakesleeanus</i> v2.0 | 379                        |
| <i>Rhizophagus cerebriforme</i> v1.0 | 353                        |
| <i>Rhizophagus diaphanus</i> v1.0    | 378                        |
| <i>Rhizophagus irregularis</i> v2.0  | 526                        |
| <i>Rhizopus microsporus</i> v1.0     | 346                        |
| <i>Diversispora epigea</i>           | 483                        |

**Supplementary Table 2: Location of Meiosis specific genes from the assembled genome of *P. occultum***

| <b>Meiosis Specific genes</b> | <b>genome co-ordinates</b> | <b><i>Paraglomus occultum</i> location</b> |
|-------------------------------|----------------------------|--------------------------------------------|
| DMC 1                         | scaffold_1752:1343-3169    | FUN_002602-T1<br>FUN_002602                |

|       |                          |                             |
|-------|--------------------------|-----------------------------|
| Hop2  | scaffold_314:15016-16315 | FUN_005394-T1<br>FUN_005394 |
| MND1  | scaffold_284:14461-16793 | FUN_004908-T1<br>FUN_004908 |
| MSH4  | scaffold_374:8049-11503  | FUN_006283-T1<br>FUN_006283 |
| MSH5  | scaffold_1742:1334-5016  | FUN_002583-T1<br>FUN_002583 |
| REC8  | scaffold_367:6724-9812   | FUN_006178-T1<br>FUN_006178 |
| SPO11 | scaffold_1592:3975-5367  | FUN_002154-T1<br>FUN_002154 |

### Supplementary Figures

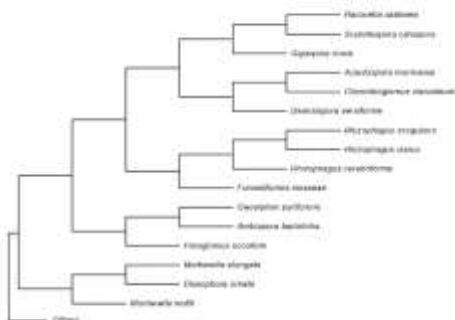

Ait\_T1

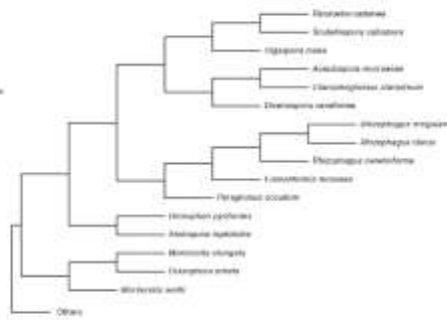

Ait\_T2

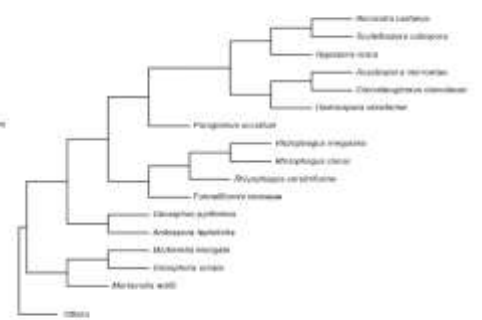

Ait\_T3

**Supplementary Figure 1:** Alternative phylogenetic placements of *Paraglomus occultum* examined in the alternative topology tests. Three alternative topologies with the *Paraglomus* at the earliest diverged position within Glomeromycotina (Alt\_T1), grouped with the *Rhizophagus* and *Funneliformis* clade (Alt\_T2), and joined with the *Gigaspora* and *Acaulospora* clade (Alt\_T3) were compared to the best tree produced in the present study given the genome-wide data set. The log-likelihoods of each of the four topologies were computed using the IQTREE package and the results including the Kishino-Hasegawa test, Shimodaira-Hasegawa test, expected likelihood weight, and approximately unbiased test were summarized in Supplemental File 4.

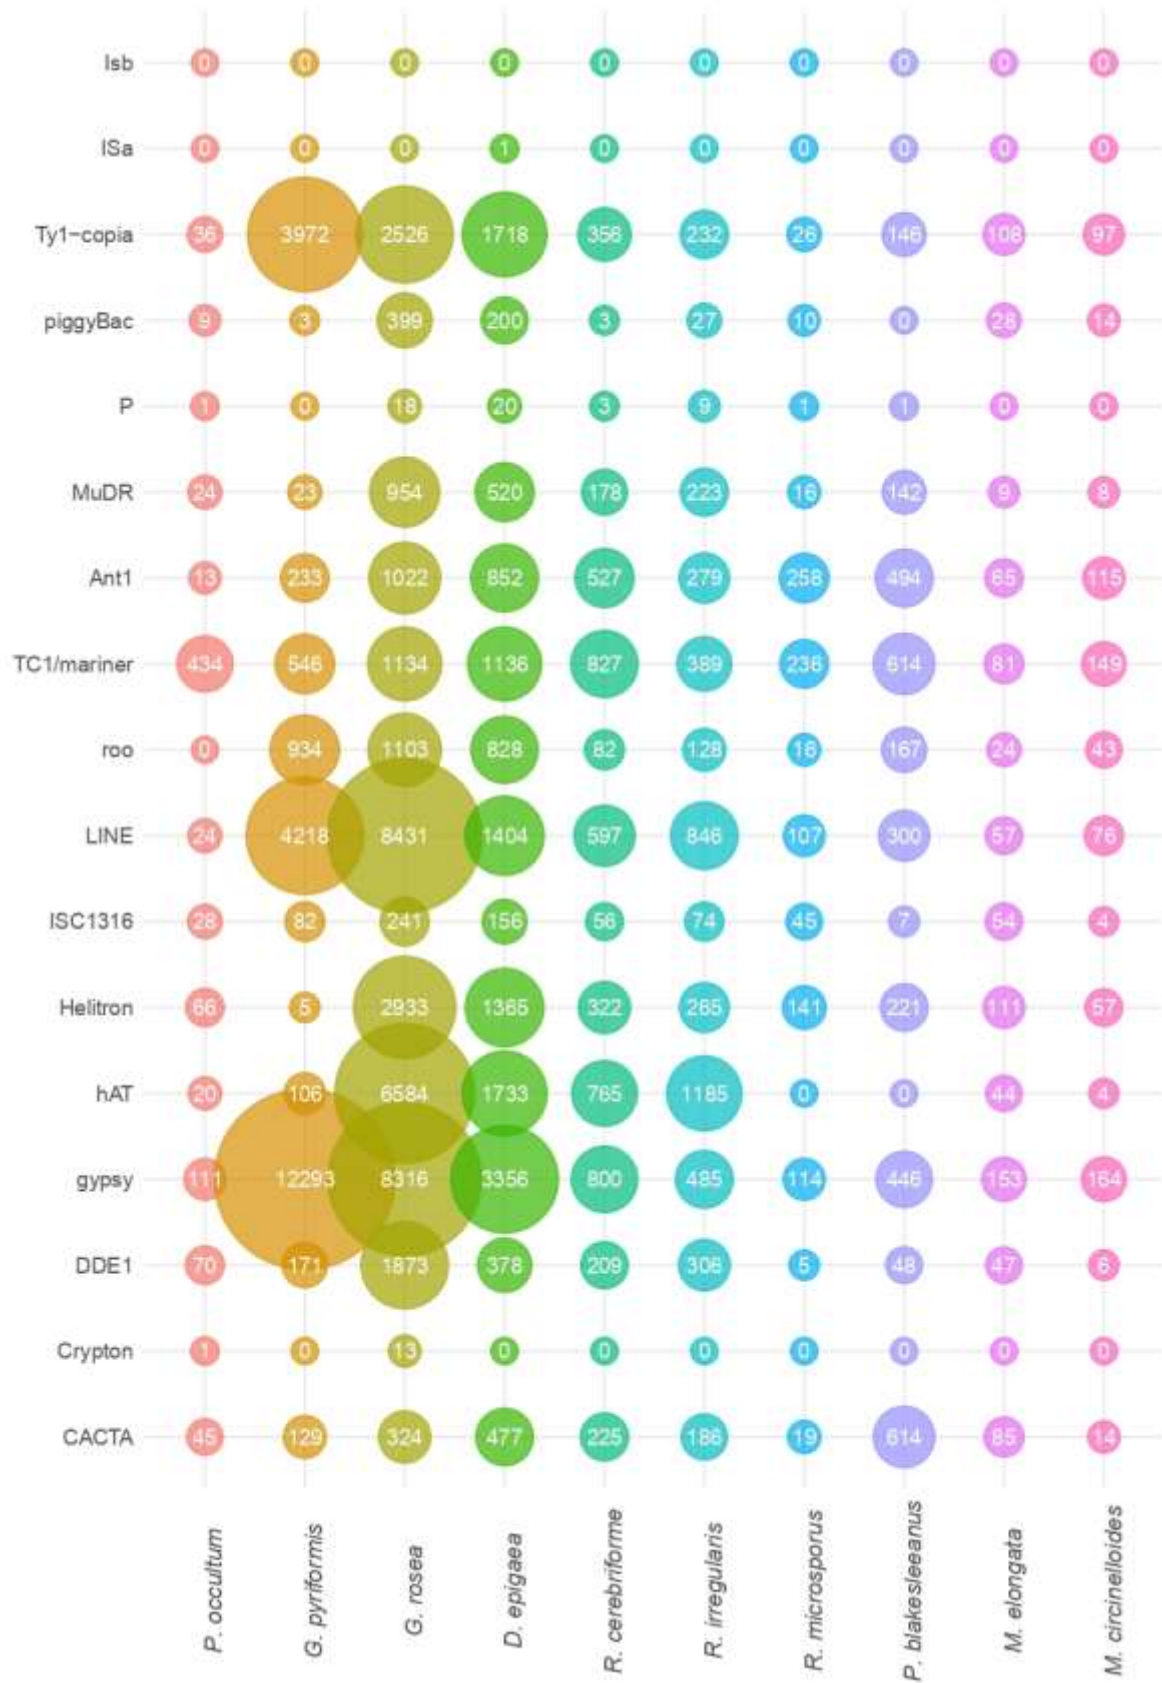

**Supplementary Figure 2:** Bubble plot containing all transposable elements predicted in this study. X-axis shows the list of genomes used in this study and Y-axis shows the categories of TE elements identified.

**Supplemental File 1: Identification of total cazyme using dbcan2 server**

| <b>Cazy family</b>                         | <i>Paraglomus occultum</i> | <i>Rhizophagus irregularis</i> | <i>Rhizoglyphus cerebriiforme</i> | <i>Gigaspora rosea</i> | <i>Diversispora epigaea</i> | <i>Geosiphon pyriformis</i> | <i>Rhizopus microsporus</i> | <i>Mortierella elongata</i> | <i>Mucor circinelloides</i> | <i>phycomyces blakesleeanus</i> |
|--------------------------------------------|----------------------------|--------------------------------|-----------------------------------|------------------------|-----------------------------|-----------------------------|-----------------------------|-----------------------------|-----------------------------|---------------------------------|
| <b>Auxillary activity AA family</b>        |                            |                                |                                   |                        |                             |                             |                             |                             |                             |                                 |
| AA11                                       | 1                          | 1                              | 1                                 | 1                      | 2                           | 4                           | 0                           | 13                          | 0                           | 0                               |
| AA1                                        | 0                          | 1                              | 1                                 | 1                      | 0                           | 0                           | 0                           | 0                           | 0                           | 2                               |
| AA2                                        | 2                          | 2                              | 2                                 | 2                      | 2                           | 3                           | 3                           | 1                           | 4                           | 2                               |
| AA3                                        | 3                          | 7                              | 10                                | 5                      | 4                           | 1                           | 1                           | 3                           | 2                           | 5                               |
| AA6                                        | 0                          | 1                              | 2                                 | 1                      | 5                           | 1                           | 3                           | 0                           | 5                           | 4                               |
| AA7                                        | 6                          | 12                             | 9                                 | 28                     | 6                           | 6                           | 1                           | 8                           | 1                           | 2                               |
| AA12                                       | 2                          | 0                              | 0                                 | 0                      | 0                           | 0                           | 1                           | 0                           | 0                           | 1                               |
| AA5                                        | 0                          | 0                              | 0                                 | 0                      | 0                           | 0                           | 0                           | 0                           | 0                           | 0                               |
| AA4                                        | 0                          | 0                              | 0                                 | 0                      | 0                           | 0                           | 1                           | 0                           | 1                           | 2                               |
|                                            |                            |                                |                                   |                        |                             |                             |                             |                             |                             |                                 |
| <b>Carbohydrate-Binding Modules Family</b> |                            |                                |                                   |                        |                             |                             |                             |                             |                             |                                 |
| CBM21                                      | 1                          | 1                              | 1                                 | 1                      | 1                           | 1                           | 5                           | 2                           | 6                           | 4                               |
| CBM14                                      | 0                          | 0                              | 0                                 | 1                      | 1                           | 0                           | 0                           | 0                           | 0                           | 0                               |
| CBM42                                      | 0                          | 0                              | 0                                 | 0                      | 1                           | 0                           | 0                           | 0                           | 0                           | 0                               |
| CBM43                                      | 0                          | 0                              | 0                                 | 0                      | 0                           | 0                           | 0                           | 1                           | 0                           | 0                               |
| CBM19                                      | 0                          | 0                              | 0                                 | 0                      | 0                           | 0                           | 1                           | 0                           | 0                           | 0                               |
| CBM5                                       | 0                          | 0                              | 0                                 | 0                      | 0                           | 0                           | 1                           | 1                           | 0                           | 0                               |
| CBM13                                      | 0                          | 0                              | 0                                 | 0                      | 0                           | 0                           | 0                           | 2                           | 0                           | 0                               |
|                                            |                            |                                |                                   |                        |                             |                             |                             |                             |                             |                                 |
| <b>Carbohydrate esterases family</b>       |                            |                                |                                   |                        |                             |                             |                             |                             |                             |                                 |
| CE16                                       | 1                          | 1                              | 2                                 | 4                      | 1                           | 15                          | 5                           | 1                           | 10                          | 3                               |
| CE4                                        | 11                         | 8                              | 10                                | 21                     | 6                           | 11                          | 19                          | 28                          | 24                          | 15                              |
| CE9                                        | 1                          | 1                              | 1                                 | 1                      | 1                           | 0                           | 1                           | 2                           | 2                           | 1                               |

|                                                  |   |   |   |    |   |   |    |    |    |   |
|--------------------------------------------------|---|---|---|----|---|---|----|----|----|---|
| CE12                                             | 0 | 0 | 0 | 0  | 1 | 0 | 0  | 0  | 0  | 0 |
| CE1                                              | 0 | 0 | 0 | 0  | 0 | 0 | 1  | 2  | 1  | 1 |
| CE2                                              | 0 | 0 | 0 | 0  | 0 | 0 | 1  | 0  | 1  | 2 |
| CE6                                              | 1 | 1 | 1 | 1  | 1 | 1 | 1  | 0  | 1  | 0 |
| CE8                                              | 0 | 0 | 0 | 0  | 0 | 0 | 3  | 0  | 0  | 4 |
|                                                  |   |   |   |    |   |   |    |    |    |   |
| <b>Glycosid<br/>e<br/>hydrolas<br/>es family</b> |   |   |   |    |   |   |    |    |    |   |
| GH125                                            | 0 | 2 | 1 | 0  | 0 | 3 | 2  | 0  | 2  | 2 |
| GH15                                             | 1 | 1 | 1 | 1  | 1 | 1 | 4  | 2  | 4  | 4 |
| GH18                                             | 2 | 1 | 1 | 11 | 3 | 3 | 12 | 11 | 15 | 8 |
| GH20                                             | 2 | 1 | 2 | 2  | 1 | 3 | 4  | 6  | 4  | 4 |
| GH24                                             | 0 | 5 | 5 | 6  | 0 | 0 | 0  | 1  | 0  | 0 |
| GH31                                             | 3 | 2 | 3 | 3  | 4 | 2 | 3  | 3  | 5  | 3 |
| GH35                                             | 1 | 2 | 2 | 2  | 1 | 1 | 1  | 1  | 1  | 1 |
| GH36                                             | 0 | 0 | 0 | 0  | 0 | 0 | 1  | 0  | 2  | 2 |
| GH37                                             | 1 | 1 | 1 | 2  | 2 | 2 | 3  | 2  | 5  | 4 |
| GH38                                             | 1 | 1 | 1 | 1  | 1 | 1 | 2  | 1  | 2  | 2 |
| GH47                                             | 4 | 5 | 6 | 6  | 4 | 5 | 9  | 6  | 7  | 7 |
| GH63                                             | 1 | 1 | 1 | 2  | 1 | 1 | 1  | 2  | 0  | 0 |
| GH9                                              | 1 | 2 | 2 | 6  | 1 | 0 | 3  | 2  | 4  | 2 |
| GH23                                             | 0 | 0 | 2 | 0  | 0 | 0 | 0  | 0  | 0  | 0 |
| GH25                                             | 0 | 0 | 0 | 1  | 0 | 0 | 0  | 0  | 0  | 0 |
| GH81                                             | 0 | 0 | 0 | 1  | 0 | 1 | 1  | 1  | 1  | 1 |
| GH85                                             | 1 | 0 | 0 | 2  | 1 | 1 | 0  | 1  | 1  | 0 |
| GH92                                             | 0 | 0 | 0 | 10 | 0 | 0 | 0  | 0  | 0  | 0 |
| GH27                                             | 1 | 0 | 0 | 1  | 0 | 1 | 0  | 1  | 0  | 0 |
| GH17                                             | 1 | 0 | 0 | 0  | 1 | 4 | 2  | 5  | 3  | 1 |
| GH25                                             | 0 | 0 | 0 | 0  | 3 | 0 | 0  | 1  | 0  | 0 |
| GH152                                            | 0 | 0 | 0 | 0  | 0 | 1 | 4  | 0  | 4  | 5 |
| GH72                                             | 0 | 0 | 0 | 0  | 0 | 0 | 1  | 2  | 1  | 2 |
| GH28                                             | 0 | 0 | 0 | 0  | 0 | 0 | 5  | 1  | 2  | 9 |
| GH45                                             | 0 | 0 | 0 | 0  | 0 | 0 | 4  | 0  | 0  | 1 |
| GH3                                              | 0 | 0 | 0 | 0  | 0 | 0 | 5  | 1  | 5  | 3 |
| GH46                                             | 0 | 0 | 0 | 0  | 0 | 0 | 2  | 0  | 1  | 1 |
| GH89                                             | 0 | 0 | 0 | 0  | 0 | 0 | 0  | 3  | 0  | 0 |
| GH8                                              | 0 | 0 | 0 | 0  | 0 | 0 | 1  | 1  | 2  | 1 |
| GH134                                            | 0 | 0 | 0 | 0  | 0 | 0 | 4  | 0  | 3  | 0 |

|                                                  |   |    |    |    |   |   |    |    |    |    |
|--------------------------------------------------|---|----|----|----|---|---|----|----|----|----|
| GH2                                              | 0 | 0  | 0  | 0  | 0 | 0 | 1  | 0  | 0  | 0  |
| GH65                                             | 0 | 0  | 0  | 0  | 0 | 0 | 1  | 0  | 0  | 0  |
| GH76                                             | 0 | 0  | 0  | 0  | 0 | 0 | 1  | 0  | 0  | 0  |
| GH95                                             | 0 | 0  | 0  | 0  | 0 | 0 | 2  | 0  | 0  | 0  |
| GH29                                             | 0 | 0  | 0  | 0  | 0 | 0 | 0  | 0  | 2  | 0  |
| GH32                                             | 0 | 0  | 0  | 0  | 0 | 0 | 0  | 0  | 0  | 1  |
| GH51                                             | 0 | 0  | 0  | 0  | 0 | 0 | 0  | 0  | 0  | 1  |
|                                                  |   |    |    |    |   |   |    |    |    |    |
| <b>Glycosyl<br/>transfera<br/>ses<br/>family</b> |   |    |    |    |   |   |    |    |    |    |
| GT15                                             | 2 | 3  | 4  | 9  | 3 | 2 | 12 | 3  | 15 | 12 |
| GT1                                              | 1 | 26 | 11 | 36 | 3 | 0 | 9  | 2  | 7  | 1  |
| GT20                                             | 3 | 3  | 3  | 3  | 2 | 2 | 6  | 4  | 8  | 7  |
| GT21                                             | 1 | 1  | 1  | 1  | 0 | 1 | 1  | 2  | 1  | 1  |
| GT22                                             | 2 | 4  | 4  | 4  | 4 | 4 | 4  | 4  | 4  | 4  |
| GT24                                             | 1 | 1  | 1  | 1  | 2 | 1 | 1  | 1  | 1  | 1  |
| GT28                                             | 1 | 1  | 1  | 0  | 0 | 0 | 0  | 0  | 0  | 0  |
| GT31                                             | 1 | 3  | 2  | 4  | 1 | 2 | 3  | 3  | 3  | 1  |
| GT33                                             | 1 | 1  | 1  | 1  | 1 | 1 | 1  | 1  | 1  | 1  |
| GT34                                             | 2 | 6  | 8  | 2  | 2 | 2 | 1  | 2  | 2  | 2  |
| GT35                                             | 1 | 1  | 1  | 1  | 1 | 1 | 2  | 1  | 2  | 0  |
| GT39                                             | 3 | 4  | 4  | 7  | 3 | 3 | 6  | 9  | 8  | 7  |
| GT3                                              | 2 | 2  | 2  | 1  | 1 | 1 | 2  | 4  | 2  | 2  |
| GT48                                             | 1 | 1  | 1  | 0  | 1 | 1 | 2  | 2  | 3  | 3  |
| GT49                                             | 3 | 3  | 3  | 3  | 3 | 2 | 8  | 7  | 8  | 5  |
| GT4                                              | 3 | 4  | 4  | 5  | 4 | 2 | 5  | 3  | 6  | 5  |
| GT50                                             | 1 | 1  | 1  | 1  | 1 | 1 | 1  | 1  | 1  | 1  |
| GT57                                             | 1 | 2  | 2  | 2  | 2 | 2 | 2  | 2  | 2  | 2  |
| GT58                                             | 0 | 1  | 1  | 1  | 1 | 1 | 1  | 1  | 1  | 1  |
| GT59                                             | 0 | 1  | 1  | 1  | 1 | 1 | 2  | 1  | 1  | 2  |
| GT5                                              | 1 | 2  | 2  | 1  | 1 | 0 | 2  | 1  | 2  | 2  |
| GT66                                             | 1 | 1  | 1  | 1  | 1 | 1 | 1  | 1  | 1  | 1  |
| GT69                                             | 0 | 1  | 0  | 0  | 0 | 0 | 0  | 0  | 0  | 1  |
| GT76                                             | 0 | 1  | 1  | 1  | 1 | 1 | 1  | 1  | 1  | 1  |
| GT8                                              | 1 | 2  | 1  | 2  | 3 | 3 | 3  | 1  | 3  | 3  |
| GT25                                             | 0 | 0  | 1  | 20 | 7 | 0 | 0  | 0  | 0  | 0  |
| GT10                                             | 5 | 0  | 0  | 11 | 0 | 0 | 1  | 10 | 2  | 1  |
| GT23                                             | 0 | 0  | 0  | 2  | 0 | 0 | 0  | 4  | 0  | 0  |

|                                                  |   |   |    |    |   |   |   |   |   |   |
|--------------------------------------------------|---|---|----|----|---|---|---|---|---|---|
| GT47                                             | 0 | 0 | 0  | 4  | 0 | 0 | 1 | 0 | 1 | 1 |
| GT10                                             | 0 | 0 | 0  | 0  | 4 | 0 | 0 | 0 | 0 | 0 |
| GT62                                             | 0 | 0 | 0  | 0  | 0 | 1 | 2 | 2 | 6 | 2 |
| GT64                                             | 0 | 0 | 0  | 0  | 0 | 0 | 1 | 0 | 2 | 1 |
| GT71                                             | 0 | 0 | 0  | 0  | 0 | 0 | 3 | 7 | 4 | 3 |
| GT77                                             | 0 | 0 | 0  | 0  | 0 | 0 | 3 | 0 | 3 | 1 |
| GT17                                             | 0 | 0 | 0  | 0  | 0 | 0 | 0 | 1 | 0 | 1 |
|                                                  |   |   |    |    |   |   |   |   |   |   |
| <b>polysach<br/>haride<br/>lyases<br/>family</b> |   |   |    |    |   |   |   |   |   |   |
| PL38                                             | 2 | 5 | 4  | 3  | 1 | 3 | 2 | 3 | 2 | 2 |
| PL14                                             | 0 | 0 | 0  | 0  | 0 | 0 | 1 | 0 | 1 | 0 |
| PL8                                              | 0 | 0 | 0  | 0  | 0 | 0 | 1 | 0 | 1 | 1 |
| PL29                                             | 0 | 0 | 0  | 0  | 0 | 0 | 0 | 2 | 0 | 0 |
|                                                  |   |   |    |    |   |   |   |   |   |   |
| <b>Subfamil<br/>ies</b>                          |   |   |    |    |   |   |   |   |   |   |
| <b>AA<br/>subfamil<br/>y</b>                     |   |   |    |    |   |   |   |   |   |   |
| AA1_1                                            | 0 | 4 | 2  | 1  | 4 | 1 | 0 | 0 | 0 | 0 |
| AA1_2                                            | 1 | 4 | 3  | 13 | 3 | 0 | 2 | 3 | 4 | 2 |
| AA5_1                                            | 8 | 8 | 12 | 4  | 2 | 3 | 2 | 4 | 1 | 1 |
| AA3_2                                            | 0 | 0 | 1  | 13 | 2 | 0 | 2 | 4 | 1 | 0 |
| AA3_1                                            | 0 | 0 | 0  | 1  | 2 | 1 | 0 | 0 | 0 | 0 |
| AA3_4                                            | 0 | 0 | 0  | 4  | 0 | 0 | 0 | 0 | 0 | 0 |
| AA1_3                                            | 0 | 0 | 0  | 0  | 2 | 0 | 0 | 0 | 0 | 0 |
|                                                  |   |   |    |    |   |   |   |   |   |   |
| <b>GH<br/>subfamil<br/>y</b>                     |   |   |    |    |   |   |   |   |   |   |
| GH13_1                                           | 1 | 1 | 1  | 1  | 0 | 3 | 1 | 0 | 0 | 0 |
| GH13_25                                          | 1 | 1 | 1  | 1  | 1 | 1 | 1 | 1 | 1 | 1 |
| GH13_8                                           | 1 | 1 | 1  | 1  | 1 | 1 | 1 | 2 | 1 | 1 |
| GH5_12                                           | 1 | 2 | 2  | 2  | 2 | 1 | 2 | 5 | 2 | 2 |
| GH5_27                                           | 0 | 1 | 1  | 0  | 0 | 0 | 0 | 2 | 1 | 0 |
| GH5_7                                            | 1 | 1 | 1  | 2  | 1 | 1 | 1 | 0 | 2 | 1 |
| GH16_19                                          | 3 | 0 | 1  | 2  | 3 | 5 | 3 | 5 | 3 | 2 |
| GH16_10                                          | 0 | 0 | 0  | 5  | 0 | 0 | 0 | 0 | 0 | 0 |
| GH30_5                                           | 0 | 0 | 0  | 13 | 0 | 0 | 0 | 0 | 0 | 0 |



|                             |     |     |     |     |     |     |     |     |     |     |
|-----------------------------|-----|-----|-----|-----|-----|-----|-----|-----|-----|-----|
| GH5_9                       | 1   | 0   | 0   | 2   | 0   | 5   | 2   | 3   | 2   | 2   |
| GH16_1                      | 0   | 0   | 0   | 0   | 0   | 0   | 2   | 1   | 2   | 0   |
| GH16_23                     | 0   | 0   | 0   | 0   | 0   | 0   | 2   | 0   | 2   | 1   |
| GH16_4                      | 0   | 0   | 0   | 0   | 0   | 0   | 1   | 1   | 1   | 1   |
| GH13_5                      | 0   | 0   | 0   | 0   | 0   | 0   | 0   | 1   | 0   | 0   |
| GH16_21                     | 0   | 0   | 0   | 0   | 0   | 0   | 0   | 4   | 0   | 0   |
| GH5_50                      | 0   | 0   | 0   | 0   | 0   | 0   | 0   | 0   | 0   | 1   |
|                             |     |     |     |     |     |     |     |     |     |     |
| <b>GT subfamily</b>         |     |     |     |     |     |     |     |     |     |     |
| GT2_Chitin_synth_1          | 3   | 6   | 6   | 18  | 2   | 2   | 4   | 6   | 6   | 7   |
| GT2_Chitin_synth_2          | 8   | 10  | 10  | 9   | 9   | 5   | 22  | 12  | 20  | 18  |
| GT2_Glycosyltransferase_2   | 2   | 2   | 3   | 2   | 3   | 2   | 2   | 2   | 2   | 2   |
| GT2_Glycosyltransferase_2_3 | 0   | 1   | 1   | 1   | 1   | 1   | 2   | 0   | 4   | 0   |
| GT2_Glycosyltransferase_2_3 | 0   | 0   | 0   | 0   | 0   | 0   | 1   | 4   | 2   | 3   |
|                             |     |     |     |     |     |     |     |     |     |     |
| <b>PL subfamily</b>         |     |     |     |     |     |     |     |     |     |     |
| PL14_4                      | 0   | 0   | 0   | 0   | 0   | 0   | 1   | 0   | 0   | 0   |
| PL14_5                      | 0   | 0   | 0   | 0   | 0   | 0   | 1   | 2   | 1   | 1   |
| PL14_3                      | 0   | 0   | 0   | 0   | 0   | 0   | 0   | 1   | 0   | 2   |
| PL3_2                       | 0   | 0   | 0   | 0   | 0   | 0   | 0   | 2   | 0   | 0   |
| PL8_3                       | 0   | 0   | 0   | 0   | 0   | 0   | 0   | 0   | 1   | 0   |
|                             |     |     |     |     |     |     |     |     |     |     |
| total<br>cazyme             | 120 | 183 | 180 | 347 | 148 | 144 | 273 | 269 | 298 | 240 |

**Supplemental File 2: Plant cell wall degrading enzymes across mucoromycotina genomes**

| <b>Fa<br/>mil<br/>y</b> | <i>Paraglomus<br/>occultum</i> | <i>R.<br/>irregu<br/>laris</i> | <i>R.<br/>cerebrif<br/>orme</i> | <i>G.<br/>ros<br/>rea</i> | <i>D.<br/>epig<br/>aea</i> | <i>G.<br/>pyrifo<br/>rmis</i> | <i>R.<br/>micros<br/>porus</i> | <i>M.<br/>elong<br/>ata</i> | <i>M.<br/>circinell<br/>oides</i> | <i>p.<br/>blakesle<br/>eanus</i> |
|-------------------------|--------------------------------|--------------------------------|---------------------------------|---------------------------|----------------------------|-------------------------------|--------------------------------|-----------------------------|-----------------------------------|----------------------------------|
| AA<br>1                 | 0                              | 1                              | 1                               | 1                         | 0                          | 0                             | 0                              | 0                           | 0                                 | 2                                |

|                |    |    |    |    |   |    |    |    |    |    |
|----------------|----|----|----|----|---|----|----|----|----|----|
| AA<br>1_2      | 1  | 4  | 3  | 13 | 3 | 0  | 2  | 3  | 4  | 2  |
| AA<br>11       | 1  | 1  | 1  | 1  | 2 | 4  | 0  | 13 | 0  | 0  |
| AA<br>12       | 2  | 0  | 0  | 0  | 0 | 0  | 1  | 0  | 0  | 1  |
| AA<br>3_2      | 0  | 0  | 1  | 13 | 2 | 0  | 2  | 4  | 1  | 0  |
| AA<br>3_4      | 0  | 0  | 0  | 4  | 0 | 0  | 0  | 0  | 0  | 0  |
| AA<br>5        | 0  | 0  | 0  | 0  | 0 | 0  | 0  | 0  | 0  | 0  |
| AA<br>5_1      | 8  | 8  | 12 | 4  | 2 | 3  | 2  | 4  | 1  | 1  |
| AA<br>7        | 6  | 12 | 9  | 28 | 6 | 6  | 1  | 8  | 1  | 2  |
| CB<br>M1<br>3  | 0  | 0  | 0  | 0  | 0 | 0  | 0  | 2  | 0  | 0  |
| CB<br>M1<br>4  | 0  | 0  | 0  | 1  | 1 | 0  | 0  | 0  | 0  | 0  |
| CB<br>M1<br>9  | 0  | 0  | 0  | 0  | 0 | 0  | 1  | 0  | 0  | 0  |
| CB<br>M2<br>1  | 1  | 1  | 1  | 1  | 1 | 1  | 5  | 2  | 6  | 4  |
| CB<br>M4<br>3  | 0  | 0  | 0  | 0  | 0 | 0  | 0  | 1  | 0  | 0  |
| CB<br>M5       | 0  | 0  | 0  | 0  | 0 | 0  | 1  | 1  | 0  | 0  |
| CE<br>16       | 1  | 1  | 2  | 4  | 1 | 15 | 5  | 1  | 10 | 3  |
| CE<br>2        | 0  | 0  | 0  | 0  | 0 | 0  | 1  | 0  | 1  | 2  |
| CE<br>4        | 11 | 8  | 10 | 21 | 6 | 11 | 19 | 28 | 24 | 15 |
| CE<br>8        | 0  | 0  | 0  | 0  | 0 | 0  | 3  | 0  | 0  | 4  |
| GH<br>13_<br>1 | 1  | 1  | 1  | 1  | 0 | 3  | 1  | 0  | 0  | 0  |
| GH<br>134      | 0  | 0  | 0  | 0  | 0 | 0  | 4  | 0  | 3  | 0  |
| GH<br>15       | 1  | 1  | 1  | 1  | 1 | 1  | 4  | 2  | 4  | 4  |
| GH<br>17       | 1  | 0  | 0  | 0  | 1 | 4  | 2  | 5  | 3  | 1  |

|         |   |   |   |    |   |   |    |    |    |   |
|---------|---|---|---|----|---|---|----|----|----|---|
| GH 18   | 2 | 1 | 1 | 11 | 3 | 3 | 12 | 11 | 15 | 8 |
| GH 20   | 2 | 1 | 2 | 2  | 1 | 3 | 4  | 6  | 4  | 4 |
| GH 24   | 0 | 5 | 5 | 6  | 0 | 0 | 0  | 1  | 0  | 0 |
| GH 25   | 0 | 0 | 0 | 1  | 0 | 0 | 0  | 0  | 0  | 0 |
| GH 25   | 0 | 0 | 0 | 0  | 3 | 0 | 0  | 1  | 0  | 0 |
| GH 27   | 1 | 0 | 0 | 1  | 0 | 1 | 0  | 1  | 0  | 0 |
| GH 28   | 0 | 0 | 0 | 0  | 0 | 0 | 5  | 1  | 2  | 9 |
| GH 3    | 0 | 0 | 0 | 0  | 0 | 0 | 5  | 1  | 5  | 3 |
| GH 30_5 | 0 | 0 | 0 | 13 | 0 | 0 | 0  | 0  | 0  | 0 |
| GH 31   | 3 | 2 | 3 | 3  | 4 | 2 | 3  | 3  | 5  | 3 |
| GH 35   | 1 | 2 | 2 | 2  | 1 | 1 | 1  | 1  | 1  | 1 |
| GH 36   | 0 | 0 | 0 | 0  | 0 | 0 | 1  | 0  | 2  | 2 |
| GH 37   | 1 | 1 | 1 | 2  | 2 | 2 | 3  | 2  | 5  | 4 |
| GH 45   | 0 | 0 | 0 | 0  | 0 | 0 | 4  | 0  | 0  | 1 |
| GH 46   | 0 | 0 | 0 | 0  | 0 | 0 | 2  | 0  | 1  | 1 |
| GH 47   | 4 | 5 | 6 | 6  | 4 | 5 | 9  | 6  | 7  | 7 |
| GH 5_27 | 0 | 1 | 1 | 0  | 0 | 0 | 0  | 2  | 1  | 0 |
| GH 5_7  | 1 | 1 | 1 | 2  | 1 | 1 | 1  | 0  | 2  | 1 |
| GH 5_9  | 1 | 0 | 0 | 2  | 0 | 5 | 2  | 3  | 2  | 2 |
| GH 51   | 0 | 0 | 0 | 0  | 0 | 0 | 0  | 0  | 0  | 1 |
| GH 63   | 1 | 1 | 1 | 2  | 1 | 1 | 1  | 2  | 0  | 0 |
| GH 72   | 0 | 0 | 0 | 0  | 0 | 0 | 1  | 2  | 1  | 2 |
| GH 76   | 0 | 0 | 0 | 0  | 0 | 0 | 1  | 0  | 0  | 0 |
| GH 81   | 0 | 0 | 0 | 1  | 0 | 1 | 1  | 1  | 1  | 1 |

|                |   |   |   |    |   |   |   |   |   |   |
|----------------|---|---|---|----|---|---|---|---|---|---|
| GH<br>9        | 1 | 2 | 2 | 6  | 1 | 0 | 3 | 2 | 4 | 2 |
| GH<br>92       | 0 | 0 | 0 | 10 | 0 | 0 | 0 | 0 | 0 | 0 |
| GH<br>95       | 0 | 0 | 0 | 0  | 0 | 0 | 2 | 0 | 0 | 0 |
| PL<br>14       | 0 | 0 | 0 | 0  | 0 | 0 | 1 | 0 | 1 | 0 |
| PL<br>14_<br>3 | 0 | 0 | 0 | 0  | 0 | 0 | 0 | 1 | 0 | 2 |
| PL<br>3_2      | 0 | 0 | 0 | 0  | 0 | 0 | 0 | 2 | 0 | 0 |

**Supplemental File 3: Missing MRCA genes across glomeromycotina core genes. Absent genes are shown as NA**

| Metabolism                    | Gene ID | Name | Description                                                                                                               | <i>P. occultum</i> | <i>G. pyriformis</i> | <i>R. irregularis</i> | <i>D. epigaea</i> | <i>R. cerebriforme</i> | <i>G. rosea</i> |
|-------------------------------|---------|------|---------------------------------------------------------------------------------------------------------------------------|--------------------|----------------------|-----------------------|-------------------|------------------------|-----------------|
| thiamine metabolism/transport | YGR144W | THI4 | Thiazole synthase                                                                                                         | NA                 | NA                   | NA                    | NA                | NA                     | NA              |
|                               | YPL214C | THI6 | Bifunctional enzyme with thiamine-phosphate pyrophosphorylase and 4-methyl-5-beta-hydroxyethyl thiazole kinase activities | NA                 | NA                   | NA                    | NA                | NA                     | NA              |
|                               | YLR237W | THI7 | Plasma membrane transporter responsible for the uptake of thiamine                                                        | NA                 | NA                   | NA                    | NA                | NA                     | NA              |

|                                        |           |        |                                                                                                         |    |    |    |    |    |    |
|----------------------------------------|-----------|--------|---------------------------------------------------------------------------------------------------------|----|----|----|----|----|----|
|                                        | YOL 055C  | THI 20 | Multifunctional protein with hydroxymethylpyrimidine phosphate (HMP-P) kinase and thiaminase activities | NA | NA | NA | NA | NA | NA |
|                                        | YPL 258C  | THI 21 | Hydroxymethylpyrimidine phosphate kinase                                                                | NA | NA | NA | NA | NA | NA |
|                                        | YPR 121 W | THI 22 | hydroxymethylpyrimidine phosphate kinases                                                               | NA | NA | NA | NA | NA | NA |
|                                        | YOR 192C  | THI 72 | Transporter of thiamine or related compound                                                             | NA | NA | NA | NA | NA | NA |
|                                        | YOR 071C  | NRT 1  | High-affinity nicotinamide riboside transporter                                                         | NA | NA | NA | NA | NA | NA |
| <b>allantoine metabolism/transport</b> | YIR0 28W  | DAL 4  | Allantoin permease                                                                                      | NA | NA | NA | NA | NA | NA |
| <b>alcohol metabolism/fermentation</b> | YGL 256 W | AD H4  | Alcohol dehydrogenase isoenzyme type IV                                                                 | NA | NA | NA | NA | NA | NA |
| <b>uracil metabolism/transport</b>     | YBL 042C  | FUI1   | High affinity uridine permease                                                                          | NA | NA | NA | NA | NA | NA |
|                                        | YBR 021 W | FUR 4  | Uracil permease                                                                                         | NA | NA | NA | NA | NA | NA |

|                                       |         |       |                                                                                              |    |    |    |    |    |    |
|---------------------------------------|---------|-------|----------------------------------------------------------------------------------------------|----|----|----|----|----|----|
| <b>detoxification/stress response</b> | YER185W | PUG1  | Plasma membrane protein with roles in the uptake of protoporphyrin IX and the efflux of heme | NA | NA | NA | NA | NA | NA |
|                                       | YGR213C | RTA1  | Protein involved in 7-aminocholesterol resistance                                            | NA | NA | NA | NA | NA | NA |
|                                       | YGR234W | YHB1  | Nitric oxide oxidoreductase                                                                  | NA | NA | NA | NA | NA | NA |
|                                       | YIL053W | RHR2  | DL-glycerol-3-phosphatase                                                                    | NA | NA | NA | NA | NA | NA |
|                                       | YPR201W | ARR3  | Arsenite transporter                                                                         | NA | NA | NA | NA | NA | NA |
|                                       | YGL196W | DSD1  | D-serine dehydratase (aka D-serine ammonia-lyase)                                            | NA | NA | NA | NA | NA | NA |
|                                       | YHR044C | DOG1  | 2-deoxyglucose-6-phosphate phosphatase                                                       | NA | NA | NA | NA | NA | NA |
|                                       | YHR043C | DOG2  | 2-deoxyglucose-6-phosphate phosphatase                                                       | NA | NA | NA | NA | NA | NA |
| <b>proteases/peptidases</b>           | YHR132C | ECM14 | Putative metalloprotease                                                                     | NA | NA | NA | NA | NA | NA |
| <b>aromatic amino acid metabolism</b> | YGL202W | ARO8  | Aromatic amino-transferase I                                                                 | NA | NA | NA | NA | NA | NA |
|                                       | YHR137W | ARO9  | Aromatic amino-transferase II                                                                | NA | NA | NA | NA | NA | NA |

|                                       |         |       |                                                                                                                               |    |    |    |    |    |    |
|---------------------------------------|---------|-------|-------------------------------------------------------------------------------------------------------------------------------|----|----|----|----|----|----|
| <b>channels/transporters</b>          | YJL093C | TOK1  | Outward-rectifier potassium channel                                                                                           | NA | NA | NA | NA | NA | NA |
|                                       | YKL221W | MC H2 | monocarboxylate permeases                                                                                                     | NA | NA | NA | NA | NA | NA |
| <b>mating type/cell cycle/budding</b> | YIL140W | AXL2  | Integral plasma membrane protein required for axial budding in haploid cells                                                  | NA | NA | NA | NA | NA | NA |
| <b>ER quality control</b>             | YPL096W | PNG1  | Conserved peptide N-glycanase required for deglycosylation of misfolded glycoproteins during proteasome-dependent degradation | NA | NA | NA | NA | NA | NA |
|                                       | YBR015C | MN N2 | Alpha-1,2-mannosyltransferase                                                                                                 | NA | NA | NA | NA | NA | NA |
|                                       | YJL186W | MN N5 | Alpha-1,2-mannosyltransferase                                                                                                 | NA | NA | NA | NA | NA | NA |
| <b>others</b>                         | YLL057C | JLP1  | Fe(II)-dependent sulfonate/alpha-ketoglutarate dioxygenase, involved in sulfonate catabolism for use as a sulfur source       | NA | NA | NA | NA | NA | NA |

|  |         |         |                                                      |    |    |    |    |    |    |
|--|---------|---------|------------------------------------------------------|----|----|----|----|----|----|
|  | YLR047C | FRE8    | Iron/copper reductases, involved in iron homeostasis | NA | NA | NA | NA | NA | NA |
|  | YLR278C | YLR278C | Zinc-cluster protein                                 | NA | NA | NA | NA | NA | NA |
|  | YIL162W | SUC2    | Invertase (Glycosyl hydrolase)                       | NA | NA | NA | NA | NA | NA |
|  | YKL182W | FAS1    | Fatty Acid Synthase                                  | NA | NA | NA | NA | NA | NA |
|  | YPL231W | FAS2    | Fatty Acid Synthase                                  | NA | NA | NA | NA | NA | NA |

**Supplemental File 4: pathway analysis of transporters and Nitrogen metabolism using KASS server**

| Pathway             | Gene function                             | paraglomus | Rhizopagus ceriberfor me | Rhizopagus irregularis | Gigaspora rosea | Geosiphon pyriformis | Diversisporae | Mortierella elongata | Mucor piriformis | Phybl | Rhimi |
|---------------------|-------------------------------------------|------------|--------------------------|------------------------|-----------------|----------------------|---------------|----------------------|------------------|-------|-------|
| Nitrogen metabolism | Nrt ( nitrogen transporter)               | 2          | 2                        | 2                      | 2               | 0                    | 2             | 2                    | 0                | 0     | 0     |
|                     | Nr ( nitrate reductase)                   | 2          | 2                        | 2                      | 2               | 0                    | 1             | 2                    | 2                | 0     | 0     |
|                     | NirBD (Nitrite reductase large subunit)   | 1          | 1                        | 1                      | 1               | 0                    | 1             | 1                    | 1                | 0     | 0     |
|                     | 1.7.1.15 nitrite reductase large subunit) | 1          | 1                        | 1                      | 1               | 0                    | 1             | 1                    | 1                | 0     | 0     |
|                     | 4.2.1.1 ( carbonic anhydrase)             | 1          | 1                        | 1                      | 1               | 1                    | 1             | 1                    | 1                | 1     | 1     |
|                     | 1.4.1.2(glutamate dehydrogenase)          | 1          | 1                        | 1                      | 1               | 1                    | 1             | 1                    | 1                | 1     | 1     |
|                     | 6.3.1.2(glutamine synthetase)             | 1          | 1                        | 1                      | 1               | 1                    | 1             | 1                    | 1                | 1     | 1     |
|                     | 1.4.1.14(glutamate synthetase)            | 1          | 1                        | 1                      | 1               | 1                    | 1             | 1                    | 1                | 1     | 1     |
|                     | 1.13.1216(nitronate monooxygenase)        | 0          | 1                        | 1                      | 0               | 0                    | 1             | 0                    | 1                | 1     | 1     |
|                     | 42.1.104 (cyanate lyase)                  | 0          | 1                        | 1                      | 1               | 1                    | 1             | 0                    | 1                | 1     | 1     |









|                                           |                                                                   |   |   |   |   |   |   |   |   |   |   |
|-------------------------------------------|-------------------------------------------------------------------|---|---|---|---|---|---|---|---|---|---|
|                                           | SRM160(serine/arginine repetitive matrix protein 1)               | 1 | 1 | 1 | 1 | 1 | 0 | 1 | 1 | 0 | 0 |
|                                           | UAP56                                                             | 0 | 1 | 1 | 1 | 1 | 1 | 1 | 1 | 1 | 1 |
|                                           | PYM(partner of Y14 and mago)                                      | 1 | 0 | 0 | 1 | 0 | 1 | 1 | 0 | 0 | 0 |
|                                           | THOC1(THO complex subunit 1)                                      | 1 | 1 | 1 | 1 | 1 | 1 | 1 | 1 | 1 | 1 |
|                                           | THOC2(THO complex subunit 2)                                      | 1 | 1 | 1 | 1 | 1 | 1 | 1 | 0 | 0 | 1 |
|                                           | THOC5 (THO complex subunit 5)                                     | 1 | 1 | 1 | 1 | 1 | 1 | 1 | 0 | 1 | 1 |
|                                           | THOC7(THO complex subunit 7)                                      | 0 | 1 | 1 | 1 | 0 | 1 | 1 | 0 | 0 | 0 |
|                                           | TEX1(THO complex subunit 3)                                       | 1 | 1 | 1 | 1 | 1 | 1 | 1 | 1 | 1 | 1 |
|                                           |                                                                   |   |   |   |   |   |   |   |   |   |   |
| SNARE interactions in vesicular transport |                                                                   |   |   |   |   |   |   |   |   |   |   |
|                                           | Stx1-4(syntaxin 1A)                                               | 2 | 2 | 2 | 2 | 2 | 2 | 2 | 2 | 2 | 2 |
|                                           | VAMP4(vesicle-associated membrane protein 4)                      | 2 | 2 | 2 | 2 | 2 | 2 | 2 | 2 | 2 | 2 |
|                                           | STx16                                                             | 2 | 2 | 2 | 2 | 2 | 2 | 2 | 2 | 2 | 2 |
|                                           | Vti 1(vesicle transport through interaction with t-SNAREs 1)      | 2 | 2 | 2 | 2 | 2 | 2 | 2 | 2 | 2 | 2 |
|                                           | VAMP7                                                             | 1 | 1 | 1 | 1 | 1 | 1 | 1 | 1 | 1 | 1 |
|                                           | STx8                                                              | 1 | 1 | 1 | 1 | 1 | 0 | 1 | 0 | 1 | 1 |
|                                           | STx5                                                              | 2 | 2 | 2 | 2 | 2 | 2 | 2 | 2 | 2 | 2 |
|                                           | Bos1(golgi SNAP receptor complex member 2)                        | 1 | 1 | 1 | 1 | 1 | 1 | 1 | 1 | 1 | 1 |
|                                           | Gos1(golgi SNAP receptor complex member 1)                        | 1 | 1 | 1 | 1 | 1 | 1 | 1 | 1 | 1 | 1 |
|                                           | Sec22                                                             | 2 | 2 | 2 | 2 | 2 | 2 | 2 | 2 | 2 | 2 |
|                                           | Ykt6(synaptobrevin homolog YKT6)                                  | 0 | 2 | 2 | 2 | 2 | 2 | 2 | 2 | 2 | 2 |
|                                           | Bet1(blocked early in transport 1)                                | 0 | 1 | 0 | 0 | 1 | 1 | 1 | 1 | 0 | 1 |
|                                           | Stx18                                                             | 1 | 1 | 1 | 1 | 1 | 1 | 1 | 1 | 1 | 1 |
|                                           | USE1(unconventional SNARE in the endoplasmic reticulum protein 1) | 0 | 1 | 1 | 1 | 0 | 1 | 0 | 0 | 1 | 0 |
|                                           | Sec20                                                             | 1 | 1 | 1 | 1 | 1 | 1 | 1 | 0 | 1 | 1 |

**Supplemental File 5: Results of alternative tree topology test for phylogenetic tree**

| Tree             | logL     | deltaL | bp-RELL | p-KH    | p-SH    | c-ELW   | p-AU    |
|------------------|----------|--------|---------|---------|---------|---------|---------|
| <b>Best tree</b> | -5959773 | 0      | 0.813 + | 0.821 + | 1 +     | 0.813 + | 0.834 + |
| <b>Alt_T1</b>    | -5959838 | 64.952 | 0.187 + | 0.179 + | 0.461 + | 0.187 + | 0.166 + |

|               |          |        |     |     |     |     |            |
|---------------|----------|--------|-----|-----|-----|-----|------------|
| <b>Alt_T2</b> | -5965217 | 5444.4 | 0 - | 0 - | 0 - | 0 - | 4.17e-07 - |
| <b>Alt_T3</b> | -5965231 | 5458.1 | 0 - | 0 - | 0 - | 0 - | 3.73e-07 - |

Legends for this table are provided below

deltaL: logL difference from the maximal logL in the set.

bp-RELL: bootstrap proportion using REll method (Kishino et al. 1990).

p-KH: p-value of one sided Kishino-Hasegawa test (1989).

p-SH: p-value of Shimodaira-Hasegawa test (1999).

c-ELW: Expected Likelihood Weight (Strimmer & Rambaut 2002).

p-AU: p-value of approximately unbiased (AU) test (Shimodaira, 2002).

Plus signs denote the 95% confidence sets.

Minus signs denote significant exclusion.

All tests performed 10000 resamplings using the REll method.

**Supplemental File 6: File containing predicted top 100 Pfam family domains identified using Pfamscan**

| <b>Pfam domain s</b> | <b><i>P. occul tum</i></b> | <b><i>G. pyrifo rmis</i></b> | <b><i>D. epiga ea</i></b> | <b><i>R. irregul aris</i></b> | <b><i>G. rose a</i></b> | <b><i>R. ceribrif orme</i></b> | <b><i>R. micros porus</i></b> | <b><i>P. blakesle eanus</i></b> | <b><i>M. circinell oides</i></b> | <b><i>M. elong ata</i></b> |
|----------------------|----------------------------|------------------------------|---------------------------|-------------------------------|-------------------------|--------------------------------|-------------------------------|---------------------------------|----------------------------------|----------------------------|
| Sell                 | 1066                       | 2202                         | 710                       | 2732                          | 1742                    | 2610                           | 212                           | 228                             | 248                              | 930                        |
| WD40                 | 412                        | 406                          | 390                       | 437                           | 430                     | 432                            | 520                           | 530                             | 533                              | 1783                       |
| Pkinase_Tyr          | 349                        | 308                          | 2420                      | 2226                          | 1778                    | 1031                           | 3                             | 3                               | 4                                | 21                         |
| LRR_6                | 331                        | 12                           | 120                       | 69                            | 3115                    | 54                             | 17                            | 25                              | 24                               | 409                        |
| BTB                  | 204                        | 208                          | 1079                      | 823                           | 515                     | 540                            | 12                            | 35                              | 7                                | 18                         |
| Pkinase              | 198                        | 147                          | 403                       | 527                           | 445                     | 370                            | 224                           | 232                             | 243                              | 212                        |
| TPR_8                | 164                        | 35                           | 249                       | 70                            | 493                     | 82                             | 24                            | 23                              | 32                               | 28                         |
| TPR_1                | 143                        | 12                           | 0                         | 20                            | 271                     | 21                             | 9                             | 6                               | 8                                | 12                         |
| RRM_1                | 125                        | 129                          | 0                         | 141                           | 145                     | 144                            | 146                           | 151                             | 131                              | 133                        |
| TLD                  | 112                        | 141                          | 862                       | 468                           | 389                     | 261                            | 5                             | 5                               | 5                                | 5                          |
| Mito_carr            | 99                         | 93                           | 112                       | 101                           | 110                     | 108                            | 144                           | 150                             | 169                              | 174                        |
| BACK                 | 97                         | 100                          | 900                       | 205                           | 378                     | 123                            | 0                             | 8                               | 0                                | 1                          |
| HMG_box              | 83                         | 93                           | 82                        | 138                           | 139                     | 136                            | 23                            | 26                              | 24                               | 15                         |
| TPR_12               | 81                         | 4                            | 0                         | 6                             | 188                     | 6                              | 2                             | 4                               | 4                                | 3                          |

|                      |    |     |     |     |     |     |     |     |     |     |
|----------------------|----|-----|-----|-----|-----|-----|-----|-----|-----|-----|
| TPR_11               | 66 | 7   | 0   | 20  | 145 | 17  | 4   | 1   | 2   | 3   |
| Helicase_C           | 62 | 67  | 84  | 89  | 94  | 82  | 77  | 73  | 80  | 91  |
| TPR_16               | 61 | 20  | 0   | 19  | 45  | 20  | 10  | 10  | 15  | 19  |
| TPR_2                | 59 | 10  | 100 | 11  | 162 | 11  | 4   | 6   | 3   | 5   |
| Myb_DNA-binding      | 59 | 160 | 66  | 54  | 52  | 50  | 29  | 20  | 16  | 37  |
| p450                 | 49 | 66  | 104 | 205 | 369 | 115 | 34  | 56  | 42  | 32  |
| DEAD                 | 48 | 48  | 72  | 52  | 62  | 59  | 52  | 50  | 49  | 62  |
| AAA                  | 45 | 38  | 62  | 58  | 67  | 63  | 47  | 57  | 55  | 56  |
| C2                   | 44 | 33  | 46  | 41  | 32  | 35  | 38  | 37  | 36  | 41  |
| ABC_transcription    | 43 | 48  | 58  | 61  | 102 | 66  | 55  | 84  | 88  | 164 |
| Methyltransferase_25 | 41 | 54  | 61  | 83  | 103 | 74  | 39  | 29  | 27  | 13  |
| F-box-like           | 38 | 57  | 80  | 138 | 196 | 158 | 52  | 146 | 88  | 162 |
| zf-C2H2              | 37 | 52  | 64  | 124 | 75  | 121 | 122 | 148 | 159 | 159 |
| CBS                  | 33 | 24  | 25  | 27  | 25  | 26  | 38  | 36  | 38  | 32  |
| Ank_2                | 33 | 28  | 23  | 34  | 45  | 35  | 40  | 28  | 34  | 33  |
| Ras                  | 31 | 27  | 33  | 33  | 72  | 30  | 54  | 56  | 64  | 42  |
| Myb_DNA-bind_6       | 30 | 53  | 20  | 27  | 19  | 45  | 9   | 8   | 11  | 13  |
| PPR_2                | 28 | 19  | 21  | 21  | 28  | 22  | 25  | 26  | 18  | 17  |
| KH_1                 | 28 | 25  | 0   | 50  | 25  | 34  | 21  | 19  | 24  | 29  |
| PPR_3                | 27 | 31  | 30  | 22  | 19  | 16  | 21  | 18  | 23  | 19  |
| PPR                  | 27 | 19  | 24  | 16  | 18  | 21  | 25  | 22  | 24  | 24  |
| DnaJ                 | 27 | 25  | 27  | 32  | 34  | 36  | 32  | 32  | 38  | 30  |
| AAA_lid_3            | 26 | 21  | 26  | 25  | 26  | 27  | 24  | 31  | 25  | 28  |
| zf-CCHC              | 25 | 294 | 129 | 35  | 41  | 28  | 16  | 15  | 19  | 17  |
| adh_short            | 25 | 35  | 25  | 49  | 64  | 40  | 20  | 23  | 35  | 47  |
| TPR_19               | 24 | 7   | 0   | 6   | 17  | 4   | 13  | 10  | 12  | 8   |
| Arm                  | 24 | 24  | 25  | 24  | 25  | 22  | 30  | 38  | 36  | 28  |
| Sugar_transport      | 23 | 13  | 13  | 10  | 24  | 11  | 29  | 29  | 56  | 21  |
| SH3_1                | 23 | 23  | 0   | 28  | 24  | 31  | 37  | 25  | 32  | 32  |
| HATPas_e_c           | 23 | 19  | 10  | 18  | 230 | 18  | 17  | 18  | 16  | 21  |
| ABC_membrane         | 23 | 30  | 37  | 37  | 80  | 41  | 17  | 43  | 45  | 100 |
| Response_reg         | 22 | 20  | 8   | 15  | 143 | 15  | 14  | 15  | 16  | 20  |

|                 |    |    |    |    |     |    |    |    |     |     |
|-----------------|----|----|----|----|-----|----|----|----|-----|-----|
| E1-E2_ATPase    | 22 | 13 | 0  | 27 | 25  | 22 | 27 | 30 | 34  | 39  |
| LRR_8           | 21 | 14 | 11 | 16 | 23  | 12 | 24 | 25 | 23  | 24  |
| EF-hand_7       | 21 | 12 | 19 | 29 | 24  | 19 | 26 | 27 | 35  | 31  |
| UQ_con          | 20 | 21 | 23 | 55 | 32  | 35 | 23 | 20 | 22  | 26  |
| PX              | 19 | 15 | 17 | 19 | 16  | 18 | 26 | 25 | 25  | 22  |
| Cyt-b5          | 19 | 15 | 19 | 26 | 41  | 22 | 30 | 34 | 35  | 24  |
| BTB_2           | 19 | 33 | 25 | 24 | 41  | 28 | 7  | 3  | 9   | 2   |
| SPRY            | 18 | 8  | 18 | 90 | 183 | 52 | 11 | 10 | 11  | 7   |
| RNA_pol_Rpb1_R  | 18 | 0  | 0  | 0  | 0   | 0  | 0  | 0  | 0   | 0   |
| RabGAP-TBC      | 18 | 13 | 17 | 17 | 19  | 16 | 26 | 32 | 30  | 22  |
| PUF             | 18 | 18 | 17 | 18 | 21  | 18 | 46 | 34 | 59  | 38  |
| MFS_1           | 18 | 35 | 0  | 45 | 118 | 45 | 72 | 76 | 120 | 102 |
| Metallophos     | 17 | 17 | 18 | 29 | 32  | 25 | 28 | 34 | 34  | 32  |
| GATA            | 17 | 21 | 28 | 24 | 24  | 28 | 42 | 36 | 36  | 28  |
| E1_DerP2_DerF2  | 17 | 3  | 0  | 37 | 13  | 21 | 3  | 3  | 4   | 14  |
| zf-RING_2       | 16 | 16 | 31 | 22 | 24  | 20 | 16 | 20 | 29  | 33  |
| ubiquitin       | 16 | 28 | 40 | 99 | 70  | 70 | 18 | 30 | 26  | 34  |
| HisKA           | 16 | 15 | 4  | 12 | 167 | 11 | 7  | 8  | 7   | 14  |
| AMP-binding     | 16 | 13 | 14 | 24 | 70  | 22 | 31 | 39 | 41  | 39  |
| AAA-ATPase-like | 16 | 2  | 32 | 12 | 6   | 21 | 0  | 0  | 0   | 2   |
| SET             | 15 | 16 | 27 | 31 | 20  | 25 | 25 | 20 | 23  | 23  |
| MMR_HSR1        | 15 | 14 | 0  | 27 | 31  | 21 | 14 | 14 | 15  | 20  |
| Ion_trans       | 15 | 7  | 17 | 58 | 59  | 44 | 9  | 17 | 17  | 25  |
| Zn_clus         | 14 | 17 | 40 | 20 | 99  | 31 | 37 | 39 | 40  | 37  |
| SNF2_N          | 14 | 14 | 14 | 16 | 15  | 16 | 24 | 21 | 22  | 23  |
| SH3_9           | 14 | 11 | 11 | 8  | 11  | 13 | 19 | 15 | 14  | 16  |
| Proteasome      | 14 | 15 | 15 | 15 | 14  | 14 | 14 | 14 | 14  | 14  |
| Prenyltrans     | 14 | 14 | 14 | 14 | 14  | 15 | 13 | 14 | 14  | 13  |

|                         |    |    |    |    |    |    |    |    |    |    |
|-------------------------|----|----|----|----|----|----|----|----|----|----|
| PH                      | 14 | 19 | 18 | 23 | 24 | 24 | 35 | 32 | 32 | 25 |
| Peptidas<br>e_S8        | 14 | 8  | 13 | 22 | 15 | 15 | 16 | 25 | 16 | 23 |
| PCI                     | 14 | 16 | 16 | 15 | 15 | 15 | 16 | 16 | 15 | 17 |
| LSM                     | 14 | 12 | 16 | 17 | 18 | 17 | 17 | 20 | 16 | 17 |
| Cation_<br>ATPase<br>_C | 14 | 6  | 10 | 16 | 18 | 13 | 13 | 15 | 17 | 20 |
| zf-<br>CCCH             | 13 | 16 | 17 | 17 | 20 | 17 | 18 | 13 | 14 | 12 |
| RhoGA<br>P              | 13 | 9  | 7  | 10 | 16 | 9  | 32 | 30 | 34 | 24 |
| Polysac<br>c_deac_<br>1 | 13 | 11 | 0  | 9  | 22 | 11 | 23 | 20 | 32 | 32 |
| PB1                     | 13 | 11 | 0  | 10 | 15 | 15 | 7  | 10 | 6  | 11 |
| LIM                     | 13 | 13 | 7  | 12 | 11 | 12 | 29 | 34 | 31 | 25 |
| HSP70                   | 13 | 9  | 13 | 70 | 28 | 44 | 13 | 27 | 20 | 21 |
| HLH                     | 13 | 16 | 12 | 13 | 21 | 12 | 40 | 35 | 37 | 26 |
| Cation_<br>ATPase       | 13 | 8  | 10 | 17 | 15 | 13 | 15 | 20 | 20 | 20 |
| Bromod<br>omain         | 13 | 14 | 20 | 52 | 15 | 16 | 22 | 16 | 23 | 23 |
| Aldedh                  | 13 | 11 | 14 | 12 | 24 | 16 | 13 | 13 | 16 | 17 |
| Actin                   | 13 | 14 | 13 | 12 | 13 | 11 | 11 | 13 | 13 | 14 |
| Abhydr<br>olase_1       | 13 | 13 | 0  | 14 | 24 | 18 | 10 | 14 | 14 | 24 |
| UCH                     | 12 | 13 | 17 | 23 | 45 | 17 | 22 | 20 | 26 | 22 |
| UBA                     | 12 | 7  | 12 | 12 | 14 | 16 | 14 | 9  | 7  | 19 |
| Pro_iso<br>merase       | 12 | 10 | 11 | 10 | 12 | 10 | 17 | 14 | 15 | 14 |
| O-FucT                  | 12 | 8  | 9  | 16 | 14 | 20 | 5  | 6  | 6  | 16 |
| Na_Ca_<br>ex            | 12 | 12 | 8  | 25 | 35 | 27 | 16 | 14 | 18 | 14 |
| Hydrola<br>se           | 12 | 9  | 12 | 18 | 25 | 16 | 15 | 14 | 18 | 27 |
| HA2                     | 12 | 8  | 11 | 10 | 8  | 11 | 7  | 4  | 10 | 9  |
| GTP_E<br>FTU            | 12 | 14 | 13 | 14 | 22 | 18 | 19 | 21 | 17 | 19 |
| G-patch                 | 12 | 11 | 10 | 13 | 11 | 12 | 11 | 9  | 9  | 11 |

Supplemental File 7: presence of TE elements in Mucoromycota genomes used in this study and TE coverage



| <b>TE type</b>         | <i>Paraglomus occultum</i> | <i>Geosiphon pyriformis</i> | <i>Gigaspora rosea</i> | <i>Diversispora epigaea</i> | <i>Rhizoglyphus ceribriforme</i> | <i>Rhizoglyphus irregularis</i> | <i>Rhizoglyphus microporus</i> | <i>Phycomyces Blakesleeensis</i> | <i>Mortierella Elongata</i> | <i>Mucor Circinelloides CBS 277.49</i> |
|------------------------|----------------------------|-----------------------------|------------------------|-----------------------------|----------------------------------|---------------------------------|--------------------------------|----------------------------------|-----------------------------|----------------------------------------|
| cacta                  | 45                         | 129                         | 324                    | 477                         | 225                              | 186                             | 19                             | 614                              | 85                          | 14                                     |
| Crypton                | 1                          | 0                           | 13                     | 0                           | 0                                | 0                               | 0                              | 0                                | 0                           | 0                                      |
| DDE_1                  | 70                         | 171                         | 1873                   | 378                         | 209                              | 306                             | 5                              | 48                               | 47                          | 6                                      |
| gypsy                  | 111                        | 12293                       | 8316                   | 3356                        | 800                              | 485                             | 114                            | 446                              | 153                         | 164                                    |
| hAT                    | 20                         | 106                         | 6584                   | 1733                        | 765                              | 1185                            | 0                              | 0                                | 44                          | 4                                      |
| helitronORF            | 66                         | 5                           | 2933                   | 1365                        | 322                              | 265                             | 141                            | 221                              | 111                         | 57                                     |
| ISC1316                | 28                         | 82                          | 241                    | 156                         | 56                               | 74                              | 45                             | 7                                | 54                          | 4                                      |
| LINE                   | 24                         | 4218                        | 8431                   | 1404                        | 597                              | 846                             | 107                            | 300                              | 57                          | 76                                     |
| ltr_Ro                 | 0                          | 934                         | 1103                   | 828                         | 82                               | 128                             | 16                             | 167                              | 24                          | 43                                     |
| marine_r               | 434                        | 546                         | 1134                   | 1136                        | 827                              | 389                             | 236                            | 614                              | 81                          | 149                                    |
| marine_r_ant1          | 13                         | 233                         | 1022                   | 852                         | 527                              | 279                             | 258                            | 494                              | 65                          | 115                                    |
| MuDR_A_B               | 24                         | 23                          | 954                    | 520                         | 178                              | 223                             | 16                             | 142                              | 9                           | 8                                      |
| P_element              | 1                          | 0                           | 18                     | 20                          | 3                                | 9                               | 1                              | 1                                | 0                           | 0                                      |
| piggyback              | 9                          | 3                           | 399                    | 200                         | 3                                | 27                              | 10                             | 0                                | 28                          | 14                                     |
| TY1_Copia              | 36                         | 3972                        | 2526                   | 1718                        | 356                              | 232                             | 26                             | 146                              | 108                         | 97                                     |
| ISa                    | 0                          | 0                           | 0                      | 1                           | 0                                | 0                               | 0                              | 0                                | 0                           | 0                                      |
| Isb                    | 0                          | 0                           | 0                      | 0                           | 0                                | 0                               | 0                              | 0                                | 0                           | 0                                      |
|                        |                            |                             |                        |                             |                                  |                                 |                                |                                  |                             |                                        |
| <b>Total TE counts</b> | 882                        | 22715                       | 35871                  | 14144                       | 4950                             | 4634                            | 994                            | 3200                             | 866                         | 751                                    |
| <b>TE per MB</b>       | 0.324924                   | 16.424177                   | 20.99229               | 8.105148                    | 2.344236                         | 2.997579                        | 0.396042                       | 2.423628                         | 0.360099                    | 0.657066                               |

**Supplemental File 8: List of Ortholog families absent in *Paraglomus occultum* genome present in other AMF's and Mortierellomycotina spp**

|                                |
|--------------------------------|
| 1,3-beta-glucanosyltransferase |
| 4F5 protein family             |
| 50S ribosomal protein L22      |

|                                                                                                                                                                                                                                                                                                                                                                                                          |
|----------------------------------------------------------------------------------------------------------------------------------------------------------------------------------------------------------------------------------------------------------------------------------------------------------------------------------------------------------------------------------------------------------|
| 50S ribosome-binding GTPase                                                                                                                                                                                                                                                                                                                                                                              |
| 5-formyltetrahydrofolate cyclo-ligase family                                                                                                                                                                                                                                                                                                                                                             |
| 5'-nucleotidase, C-terminal domain                                                                                                                                                                                                                                                                                                                                                                       |
| 6-O-methylguanine DNA methyltransferase, DNA binding domain                                                                                                                                                                                                                                                                                                                                              |
| ABC1 domain protein                                                                                                                                                                                                                                                                                                                                                                                      |
| ABC-2 type transporter                                                                                                                                                                                                                                                                                                                                                                                   |
| acetyltransferase, GNAT family                                                                                                                                                                                                                                                                                                                                                                           |
| acyl-CoA-binding protein                                                                                                                                                                                                                                                                                                                                                                                 |
| adenosyl-L-methionine (AdoMet)-dependent tRNA (uracil-O(2)-)-methyltransferase (By similarity)                                                                                                                                                                                                                                                                                                           |
| AhpC TSA family protein                                                                                                                                                                                                                                                                                                                                                                                  |
| AIG2-like family                                                                                                                                                                                                                                                                                                                                                                                         |
| Alpha-1,2-galactosyltransferase                                                                                                                                                                                                                                                                                                                                                                          |
| Alpha-1,3-mannosyltransferase alg-2                                                                                                                                                                                                                                                                                                                                                                      |
| alpha-1,6-mannosyltransferase                                                                                                                                                                                                                                                                                                                                                                            |
| alpha-tubulin suppressor protein Aats1                                                                                                                                                                                                                                                                                                                                                                   |
| Altered inheritance of mitochondria protein 24, mitochondrial                                                                                                                                                                                                                                                                                                                                            |
| AMMECR1 family                                                                                                                                                                                                                                                                                                                                                                                           |
| aromatic ring-opening dioxygenase                                                                                                                                                                                                                                                                                                                                                                        |
| Arsenical pump membrane protein                                                                                                                                                                                                                                                                                                                                                                          |
| aryl-alcohol dehydrogenase                                                                                                                                                                                                                                                                                                                                                                               |
| Assembly factor required for Rieske Fe-S protein RIP1 incorporation into the cytochrome b-c1 (CIII) complex. Functions as a chaperone, binding to this subunit within the mitochondrial matrix and stabilizing it prior to its translocation and insertion into the late CIII dimeric intermediate within the mitochondrial inner membrane. Modulates the mitochondrial matrix zinc pool (By similarity) |
| AT DNA binding protein                                                                                                                                                                                                                                                                                                                                                                                   |
| atp-dependent rna helicase                                                                                                                                                                                                                                                                                                                                                                               |
| ATP-independent protease that degrades mitochondrial transit peptides after their cleavage. Also degrades other unstructured peptides (By similarity)                                                                                                                                                                                                                                                    |
| ATP-utilising chromatin assembly and remodelling N-terminal                                                                                                                                                                                                                                                                                                                                              |
| auxin efflux carrier                                                                                                                                                                                                                                                                                                                                                                                     |
| Benzoate 4-monooxygenase cytochrome P450                                                                                                                                                                                                                                                                                                                                                                 |
| Beta-galactosidase                                                                                                                                                                                                                                                                                                                                                                                       |
| Beta-ketoacyl synthase, N-terminal domain                                                                                                                                                                                                                                                                                                                                                                |
| Beta-lactamase                                                                                                                                                                                                                                                                                                                                                                                           |
| BolA-like protein                                                                                                                                                                                                                                                                                                                                                                                        |
| BRCA1 C Terminus (BRCT) domain                                                                                                                                                                                                                                                                                                                                                                           |
| Cactus-binding C-terminus of cactin protein                                                                                                                                                                                                                                                                                                                                                              |
| Calcineurin-like phosphoesterase                                                                                                                                                                                                                                                                                                                                                                         |
| Carboxypeptidase S1                                                                                                                                                                                                                                                                                                                                                                                      |
| cation binding                                                                                                                                                                                                                                                                                                                                                                                           |
| CDP-diacylglycerol-inositol 3-phosphatidyltransferase                                                                                                                                                                                                                                                                                                                                                    |

|                                                                                                          |
|----------------------------------------------------------------------------------------------------------|
| Cellular morphogenesis protein                                                                           |
| chloride channel                                                                                         |
| Choline kinase                                                                                           |
| cipC-like antibiotic response protein                                                                    |
| CSL zinc finger                                                                                          |
| ctr copper transporter family protein                                                                    |
| CutC family                                                                                              |
| Cx9C motif-containing protein 4, mitochondrial                                                           |
| cyclic nucleotide-binding                                                                                |
| CYCLIN                                                                                                   |
| Cysteine dioxygenase type I                                                                              |
| cytidine deaminase                                                                                       |
| D-amino acid oxidase                                                                                     |
| DDT domain protein                                                                                       |
| deaminase                                                                                                |
| Demethylmenaquinone methyltransferase                                                                    |
| Deoxycytidylate deaminase                                                                                |
| deoxyuridine 5'-triphosphate nucleotidohydrolase                                                         |
| dienelactone hydrolase                                                                                   |
| D-isomer specific 2-hydroxyacid dehydrogenase, catalytic domain                                          |
| DJ-1 PfpI family protein                                                                                 |
| DNA- helicase                                                                                            |
| DNL zinc finger domain-containing protein                                                                |
| Dolichol phosphate-mannose biosynthesis regulatory protein                                               |
| Dolichyl-phosphate mannosyltransferase polypeptide 3                                                     |
| DUF1264 domain protein                                                                                   |
| DUF159 domain protein                                                                                    |
| DUF323 domain-containing protein                                                                         |
| DUF431 domain-containing protein                                                                         |
| DUF543 domain protein                                                                                    |
| DUF636 domain-containing protein                                                                         |
| DUF726 domain protein                                                                                    |
| DUF907 domain-containing protein                                                                         |
| DUF967 domain protein                                                                                    |
| E1-like activating enzyme involved in cytoplasm to vacuole transport (Cvt) and autophagy (By similarity) |
| EBP domain protein                                                                                       |
| ELMO/CED-12 family                                                                                       |
| Endo-1,3-beta-glucanase                                                                                  |
| endonuclease exonuclease phosphatase family protein                                                      |

|                                                                                                                                                                                                                                                                                                                                                                                                                              |
|------------------------------------------------------------------------------------------------------------------------------------------------------------------------------------------------------------------------------------------------------------------------------------------------------------------------------------------------------------------------------------------------------------------------------|
| ER-derived vesicles protein erv14                                                                                                                                                                                                                                                                                                                                                                                            |
| erythromycin esterase                                                                                                                                                                                                                                                                                                                                                                                                        |
| exonuclease                                                                                                                                                                                                                                                                                                                                                                                                                  |
| exosome-associated family                                                                                                                                                                                                                                                                                                                                                                                                    |
| Filament-forming protein                                                                                                                                                                                                                                                                                                                                                                                                     |
| flavodoxin and radical SAM domain protein                                                                                                                                                                                                                                                                                                                                                                                    |
| flotillin domain protein                                                                                                                                                                                                                                                                                                                                                                                                     |
| Fn3-like domain (DUF1034)                                                                                                                                                                                                                                                                                                                                                                                                    |
| Folate-sensitive fragile site protein Fra10Ac1                                                                                                                                                                                                                                                                                                                                                                               |
| Found in mitochondrial proteome protein 29                                                                                                                                                                                                                                                                                                                                                                                   |
| Fumarylacetoacetase                                                                                                                                                                                                                                                                                                                                                                                                          |
| FUN14 family                                                                                                                                                                                                                                                                                                                                                                                                                 |
| G2-specific protein kinase                                                                                                                                                                                                                                                                                                                                                                                                   |
| GDSL lipase acylhydrolase family protein                                                                                                                                                                                                                                                                                                                                                                                     |
| Glutaryl-CoA dehydrogenase                                                                                                                                                                                                                                                                                                                                                                                                   |
| glycerophosphoryl diester phosphodiesterase                                                                                                                                                                                                                                                                                                                                                                                  |
| Glycoside hydrolase family 18 protein                                                                                                                                                                                                                                                                                                                                                                                        |
| glycoside hydrolase family 24                                                                                                                                                                                                                                                                                                                                                                                                |
| glycoside hydrolase family 5 protein                                                                                                                                                                                                                                                                                                                                                                                         |
| GNAT family acetyltransferase Nat4                                                                                                                                                                                                                                                                                                                                                                                           |
| Got1/Sft2-like family                                                                                                                                                                                                                                                                                                                                                                                                        |
| HAL protein kinase                                                                                                                                                                                                                                                                                                                                                                                                           |
| HAMP domain                                                                                                                                                                                                                                                                                                                                                                                                                  |
| haspin protein kinase                                                                                                                                                                                                                                                                                                                                                                                                        |
| helicase, member of the UBC2 RAD6 epistasis group. Functions with DNA repair protein RAD18 in error-free postreplication DNA repair. Involved in the maintenance of wild- type rates of instability of simple repetitive sequences such as poly(GT) repeats. Seems to be involved in maintaining a balance which acts in favor of error-prone non-homologous joining during DNA double-strand breaks repairs (By similarity) |
| HELICc                                                                                                                                                                                                                                                                                                                                                                                                                       |
| helix-loop-helix DNA-binding domain-containing protein                                                                                                                                                                                                                                                                                                                                                                       |
| Hemerythrin HHE cation binding domain                                                                                                                                                                                                                                                                                                                                                                                        |
| HORMA domain                                                                                                                                                                                                                                                                                                                                                                                                                 |
| HPP family                                                                                                                                                                                                                                                                                                                                                                                                                   |
| HSF                                                                                                                                                                                                                                                                                                                                                                                                                          |
| Imidazoleglycerol-phosphate dehydratase                                                                                                                                                                                                                                                                                                                                                                                      |
| INSIG domain-containing protein                                                                                                                                                                                                                                                                                                                                                                                              |
| intron homing                                                                                                                                                                                                                                                                                                                                                                                                                |
| Isoprenylcysteine carboxyl methyltransferase (ICMT) family                                                                                                                                                                                                                                                                                                                                                                   |
| K09885 aquaporin related protein, other eukaryote                                                                                                                                                                                                                                                                                                                                                                            |

|                                                                                                                                        |
|----------------------------------------------------------------------------------------------------------------------------------------|
| K13099 CD2 antigen cytoplasmic tail-binding protein 2                                                                                  |
| KOW motif domain protein                                                                                                               |
| Lactoylglutathione lyase                                                                                                               |
| La domain                                                                                                                              |
| Lipid binding protein                                                                                                                  |
| Lipid transfer protein                                                                                                                 |
| LisH                                                                                                                                   |
| long-chain-fatty-acid-CoA ligase                                                                                                       |
| L-PSP endoribonuclease family protein (Hmf1)                                                                                           |
| lysosomal cobalamin transporter. Required to export cobalamin from lysosomes allowing its conversion to cofactors (By similarity)      |
| lysozyme                                                                                                                               |
| MAGE family                                                                                                                            |
| mating-type switching protein swi10                                                                                                    |
| Mediates inactivation of the TORC1 complex in response to amino acid starvation. Required for meiotic nuclear division (By similarity) |
| meiosis-specific serine threonine-protein kinase mek1                                                                                  |
| Membrane magnesium transporter                                                                                                         |
| metallo-protease                                                                                                                       |
| MIND kinetochore complex component Nnf1                                                                                                |
| mitogen-activated protein kinase MAF1                                                                                                  |
| Myb-like DNA-binding domain                                                                                                            |
| N-acylethanolamine amidohydrolase                                                                                                      |
| Nadh-ubiquinone oxidoreductase b18 subunit                                                                                             |
| NIF domain protein                                                                                                                     |
| NmrA-like family                                                                                                                       |
| norsolorinic acid reductase                                                                                                            |
| Nuclease domain-containing protein 1                                                                                                   |
| nucleolin protein Nsr1                                                                                                                 |
| nucleolus protein                                                                                                                      |
| NUDIX domain                                                                                                                           |
| o-acetylhomoserine                                                                                                                     |
| oligoribonuclease                                                                                                                      |
| Oligosaccharyl transferase subunit                                                                                                     |
| O-methyltransferase                                                                                                                    |
| Optic atrophy 3 protein (OPA3)                                                                                                         |
| OPT oligopeptide transporter protein                                                                                                   |
| Oxidoreductase-like protein, N-terminal                                                                                                |
| permease                                                                                                                               |
| Pfam:DUF2010                                                                                                                           |

|                                                                       |
|-----------------------------------------------------------------------|
| Pfam:DUF2044                                                          |
| Pfam:DUF889                                                           |
| Pfs, NACHT, and Ankyrin domain protein                                |
| polarized growth protein                                              |
| Poly (ADP-ribose) glycohydrolase (PARG)                               |
| Potassium ion channel Yvc1                                            |
| Potassium transporter                                                 |
| PPIC-type PPIASE domain                                               |
| Prefoldin subunit                                                     |
| Pre-SET motif                                                         |
| Probable N6-adenine methyltransferase                                 |
| propionyl-CoA carboxylase                                             |
| Protoporphyrinogen oxidase                                            |
| recombination hotspot-binding protein                                 |
| RED-like protein N-terminal region                                    |
| Rhodanese domain protein                                              |
| RING-14 protein                                                       |
| S1/P1 Nuclease                                                        |
| SCAMP family                                                          |
| Scavenger mRNA decapping enzyme C-term binding                        |
| Sds3-like                                                             |
| Serum paraoxonase arylesterase family protein                         |
| Sgf11 (transcriptional regulation protein)                            |
| SIT4-Associating protein                                              |
| SMR domain-containing protein                                         |
| Snf1 kinase complex beta-subunit Gal83                                |
| SnoRNA binding protein                                                |
| Spo7-like protein                                                     |
| SprT                                                                  |
| SRR1                                                                  |
| subunit Mnn9                                                          |
| Subunits I, II and III form the functional core of the enzyme complex |
| subunit Trm112                                                        |
| SUMO activating enzyme                                                |
| Taurine catabolism dioxygenase TauD, TfdA family                      |
| TB2/DP1, HVA22 family                                                 |
| Tetracycline transporter                                              |
| Thiopurine S-methyltransferase (TPMT)                                 |
| Translin family                                                       |

|                                                    |
|----------------------------------------------------|
| Tyrosyl-DNA phosphodiesterase                      |
| ubiquitin-40S ribosomal protein S31 fusion protein |
| ubiquitin-60S ribosomal protein L40 fusion protein |
| Ulp1 protease family, C-terminal catalytic domain  |
| Universal stress protein family                    |
| Ureidoglycolate hydrolase                          |
| Vitamin-D-receptor interacting Mediator subunit 4  |
| YCII-related domain                                |
| YdiU domain protein                                |
| Yippee zinc-binding protein                        |
